# Supplementary material
Source: PubMed Central journal article supplement (PMC6837157)
Supplement: bi8b00910_si_001.pdf [file bi8b00910_si_001.pdf]

**Poly(ADP-ribose) engages the TDP-43 nuclear-localization sequence to regulate granulo-filamentous aggregation**

Leeanne McGurk<sup>1#</sup>, Edward Gomes<sup>2#</sup>, Lin Guo<sup>2#</sup>, James Shorter<sup>2\*</sup>, and Nancy M. Bonini<sup>1\*</sup>.

**Affiliations**

<sup>1</sup>Department of Biology, University of Pennsylvania, Philadelphia, PA 19104, USA

<sup>2</sup>Department of Biochemistry and Biophysics, Perelman School of Medicine, University of Pennsylvania, Philadelphia, PA 19104, USA

#co-first authors

\*co-corresponding authors.

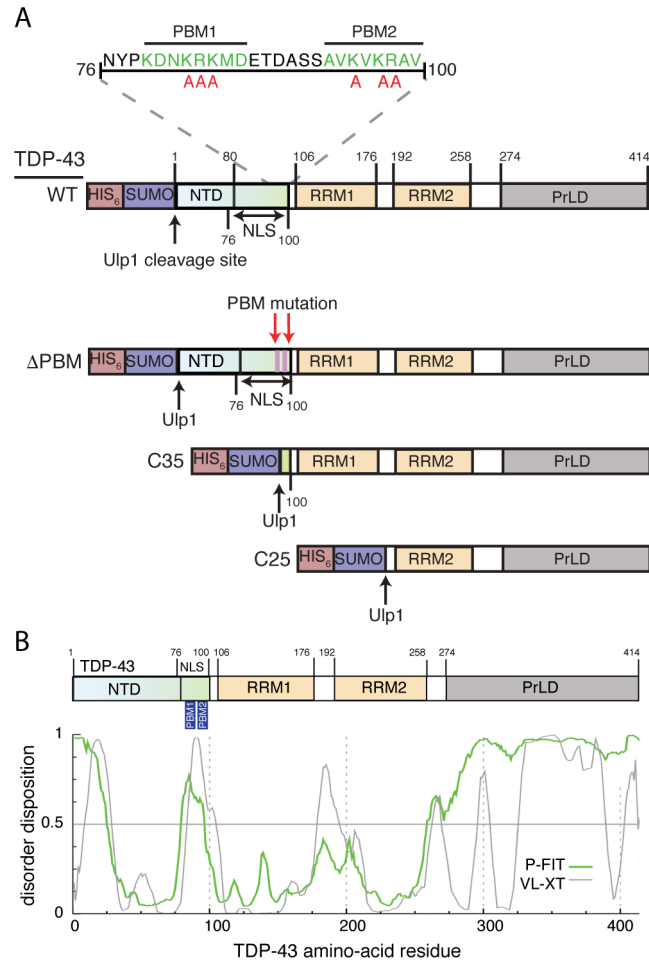

**Figure S1. TDP-43 domain architecture.**

**A.** Schematic of TDP-43 constructs used in this study. The Ulp1 cleavage site is downstream of the HIS<sub>6</sub>-SUMO-tag and upstream of the TDP-43 ATG-start codon in all constructs. The amino acids in green are the PAR-binding motifs (PBM1 and PBM2), and the red amino acids represent the mutations made to generate TDP-43-ΔPBM. NTD: N-terminal domain. NLS: Nuclear localization sequence. PBM: PAR-binding motif. RRM: RNA recognition motif. PrLD: prion-like domain.

**B.** Schematic of the domain architecture of TDP-43 and predicted disorder. Disorder was predicted using an online database with the VL-XT and P-Fit (PONDR-Fit) algorithms.<sup>1-3</sup>

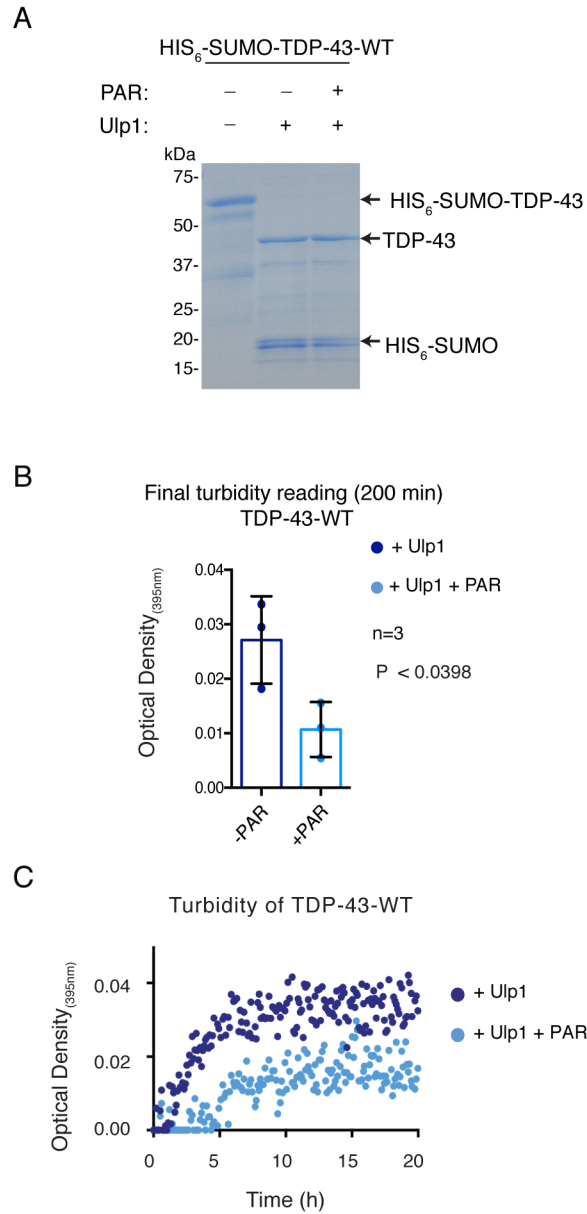

**Figure S2: PAR reduces TDP-43 aggregation *in vitro*.**

**A.** Incubation of Ulp1 with purified 10  $\mu$ M SUMO-TDP-43-WT results in cleavage of the N-terminal HIS<sub>6</sub>-SUMO-tag to produce TDP-43-WT and HIS<sub>6</sub>-SUMO at the expected molecular weights. PAR at substoichiometric amounts (6  $\mu$ M equivalents to mono(ADP-ribose)) had no effect on Ulp1-cleavage of 10  $\mu$ M HIS<sub>6</sub>-SUMO-TDP-43-WT. The final turbidity samples (200 min) were processed for SDS-PAGE and visualized by Coomassie blue staining.

**B.** PAR, at a concentration of 6  $\mu\text{M}$  equivalents to mono(ADP-ribose), reduces the final optical density measurement at 395 nm (200 min) of 10  $\mu\text{M}$  TDP-43-WT compared to PAR buffer control. The mean of the final  $\text{OD}_{395}$  ( $\pm$  SD) is presented. The n value is 3 independent experiments performed on two separate preparations of protein and demonstrates the reproducibility of the data. A two-tailed and unpaired T-test was performed.

**C.** Ulp1-cleavage of 10  $\mu\text{M}$  His<sub>6</sub>-SUMO-TDP-43-WT at 30°C leads to an increase in optical density at 395 nm that plateaus after 10-20 h. Co-incubation with PAR at 6  $\mu\text{M}$  equivalents to mono(ADP-ribose) reduces the amplitude of the plateau phase, indicating that PAR reduces TDP-43 aggregation. Graph is a representative dataset.

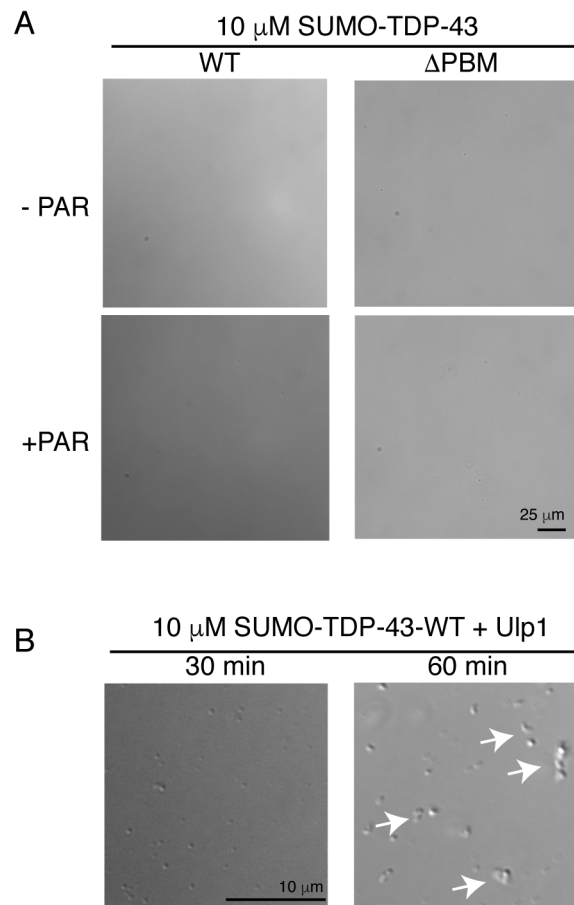

**Figure S3. Examination of cleaved TDP-43 by optical microscopy.**

**A.** SUMO-TDP-43-WT and SUMO-TDP-43- $\Delta$ PBM in 70 mM NaCl remained diffuse as examined by differential interference contrast (DIC) microscopy.

**B.** Ulp1-cleaved SUMO-TDP-43-WT in 70mM NaCl forms spherical structures that after 60 min coalesce into irregular solid structures (arrows).

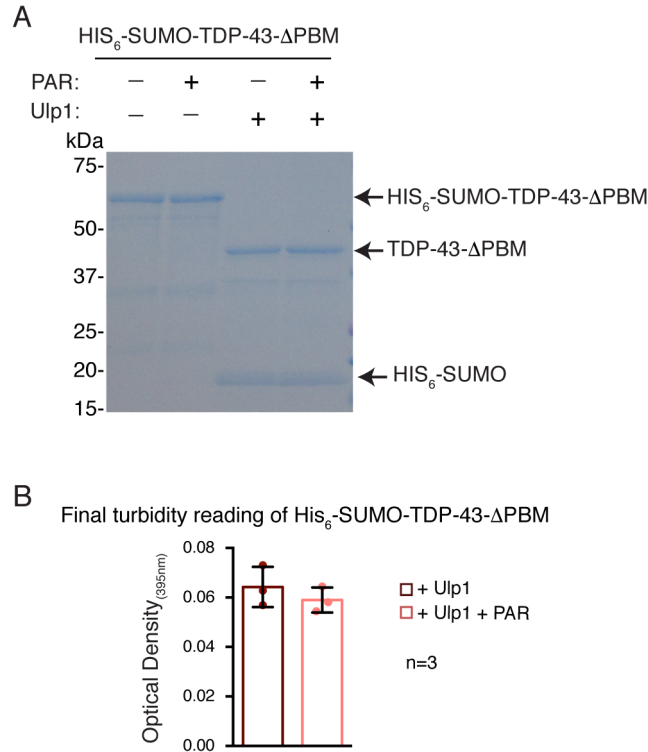

**Figure S4. The PAR-binding motifs are required for PAR-mediated inhibition of TDP-43 aggregation.**

**A.** Incubation of Ulp1 with purified HIS<sub>6</sub>-SUMO-TDP-43-ΔPBM (10 μM) results in cleavage of the N-terminal HIS<sub>6</sub>-SUMO tag to produce TDP-43-ΔPBM and HIS<sub>6</sub>-SUMO at the expected molecular weights. PAR at 6 μM equivalents to mono(ADP-ribose) has no effect on Ulp1-cleavage of HIS<sub>6</sub>-SUMO-TDP-43-ΔPBM (10 μM). The final turbidity protein samples were processed for SDS-PAGE and visualized by Coomassie blue staining.

**B.** The final optical density measurement at 395 nm (54 h) of 10 μM SUMO-TDP-43-ΔPBM is unaltered by the addition of PAR at a concentration of 6 μM equivalents to mono(ADP-ribose). The mean of the final optical density reading at 395 nm (± SD.) from 3 independent experiments from 2 independent protein preparations is presented and demonstrates the reproducibility of the data. A two-tailed unpaired T-test was performed. The final turbidity readings were not significantly different ( $P = 0.3952$ ).

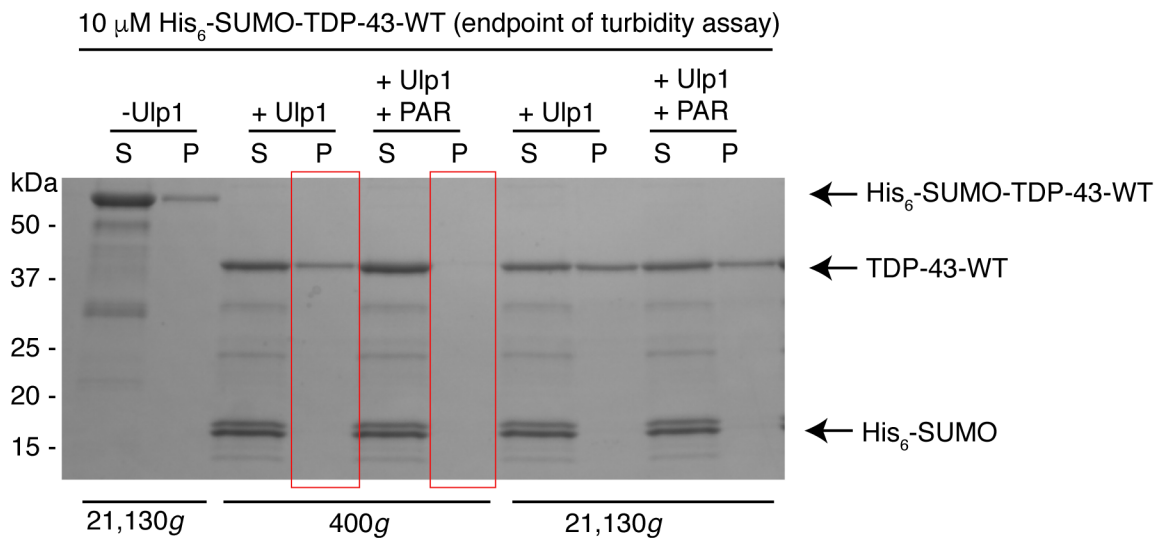

**Figure S5. PAR inhibits formation of large TDP-43 aggregates.**

HIS<sub>6</sub>-SUMO-TDP-43-WT was subjected to a turbidity assay and the resulting protein was separated into the supernatant (S) and the pellet fraction (P), the protein samples were denatured and electrophoresed on an SDS-polyacrylamide gel. At 400g, only the large aggregates are pelleted, and in the presence of 6  $\mu$ M PAR the amount the TDP-43-WT in the pellet fraction (P) was reduced (compare red boxes), see Figure 3B for quantification. At 21,130g, large and small TDP-43 aggregates are pelleted and the presence of PAR had no effect on the amount of TDP-43-WT in the insoluble pellet. For quantification see Figure 3C. Consistent with the TEM analysis (see Figure 3A-B), these data indicate that PAR inhibits the formation of large TDP-43 aggregates.

A

|                       | 1 $\mu$ M HIS <sub>6</sub> -SUMO-TDP-43 |           |           | $\alpha$ -Syn<br>(1 $\mu$ M) | Buffer |
|-----------------------|-----------------------------------------|-----------|-----------|------------------------------|--------|
|                       | WT+Ulp1                                 | C25 -Ulp1 | C25 +Ulp1 |                              |        |
| ThT fluorescence (AU) | 297                                     | 296       | 204       | 2479                         | 261    |

B

|                       | 10 $\mu$ M HIS <sub>6</sub> -SUMO-TDP-43 |           |           | $\alpha$ -Syn<br>(1.8 $\mu$ M) | Buffer |
|-----------------------|------------------------------------------|-----------|-----------|--------------------------------|--------|
|                       | WT+Ulp1                                  | C25 -Ulp1 | C25 +Ulp1 |                                |        |
| ThT fluorescence (AU) | 676                                      | 277       | 683       | 3640                           | 207    |

**Figure S6. TDP-43-C25 aggregates were not reactive to Thioflavin T.**

**A.** TDP-43-WT and TDP-43-C25 (both 1  $\mu$ M) at the endpoint of a turbidity assay were tested for reactivity to 10  $\mu$ M Thioflavin T (ThT) excited at 440 nm. Emission was collected at 482 nm. While the positive control,  $\alpha$ -Synuclein ( $\alpha$ -Syn) fibrils, was reactive to ThT, TDP-43-WT, HIS<sub>6</sub>-SUMO-TDP-43-C25 and TDP-43-C25 were no different to the buffer alone negative control. These data indicate that under these conditions these protein variants do not have amyloid-like properties.

**B.** At higher protein concentrations, TDP-43-WT, HIS<sub>6</sub>-SUMO-TDP-43-C25 and TDP-43-C25 remained non-reactive to ThT.



## METHODS

### Plasmids

Human TDP-43 (Uniprot ID: Q13148), TDP-43- $\Delta$ PBM, TDP-43-C35 and TDP-43-C25 subcloned into pE-SUMO (LifeSensors, Malvern, PA) are as described.<sup>4</sup> Ulp1 was cloned into pFGET19 (Addgene #64697). All plasmid inserts were fully sequenced and confirmed to be correct.

### PAR polymer

Free PAR (commercially obtained from TREVIGEN (Gaithersburg, MD)) was synthesized from PARP-1 and ranged in size from 2-300 ADP-ribose subunits. Molar equivalencies were calculated by TREVIGEN. Briefly, the Absorbance of the PAR at 258 nm was divided by the extinction coefficient of ADP-ribose ( $13,500 \text{ cm}^{-1} \text{ M}^{-1}$ ).<sup>5,6</sup>

### Purification of Recombinant His<sub>6</sub>-SUMO-TDP-43 and aggregation assays

HIS<sub>6</sub>-SUMO N-terminally tagged TDP-43-WT, TDP-43- $\Delta$ PBM, TDP-43-C35 and TDP-43-C25 were purified as described.<sup>4</sup> Yeast HIS<sub>6</sub>-Ulp1 protease (Ulp1, Uniprot ID: Q02724) was purified as described for His<sub>6</sub>-SUMO N-terminally tagged TDP-43-WT.<sup>4</sup> Prior to the turbidity assay, protein was thawed and centrifuged at 16,100g for 10 min to remove any preformed aggregates. Protein concentration was determined by Bradford assay (Bio-Rad, Hercules, CA). The kinetics of TDP-43 aggregation were assessed via turbidity assay by measuring the optical density at 395 nm at regular time intervals. Briefly, 10  $\mu$ M of the indicated protein was incubated in 50 mM HEPES-NaOH (pH 7.5), 5% glycerol, 70 mM NaCl, 5 mM DTT, 6 mM TrisHCl (pH 8), 0.6 mM EDTA with shaking at 30°C in Nunc 96-well optical bottom plates (Thermo Fisher Scientific, Waltham, MA) with PAR (Trevigen, Gaithersburg, MD) at a concentration of 6  $\mu$ M mono(ADP-ribose) equivalents in 10 mM Tris-HCl (pH 8) and 1 mM EDTA, or equivalent volume of buffer (10 mM Tris-HCl [pH 8] and 1 mM EDTA). At time 0, cleavage of the HIS<sub>6</sub>-SUMO tag was initiated with 1.8  $\mu$ g of Ulp1. Turbidity data are represented as the relative change, which was calculated by subtracting the initial OD<sub>395</sub> value from the final OD<sub>395</sub> value.

### **Transmission electron microscopy**

Transmission electron microscopy (TEM) of the aggregates was performed as described.<sup>7</sup> Briefly, at the end point of the turbidity assay (200 min for TDP-43-WT and 54 h for TDP-43- $\Delta$ PBM) samples were diluted two-fold, 10  $\mu$ L of the diluted sample was adsorbed onto 300-mesh Formvar/carbon-coated copper grids (Electron Microscopy Sciences, Hatfield, PA) and stained with 2% (w/v) uranyl acetate. Excess uranyl acetate solution was removed and the grids were dried. Samples were imaged using a FEI-Tecnai and a JEOL-1010T12 transmission electron microscope. For quantification, 2-3 micrographs representing each protein were analyzed by ImageJ.<sup>8</sup> 1534-5829 aggregates were quantified for each protein condition.

### **Sedimentation assay**

HIS<sub>6</sub>-SUMO-TDP-43-WT (10  $\mu$ M) was subjected to a turbidity assay and at the end of the 200-min reaction, the resulting protein was separated into the supernatant fraction (S) and the pellet fraction (P) by centrifugation for 10 min at 4°C with speed of 400g or 21,130g. Supernatant and pellet fractions were then denatured in Laemmli buffer and  $\beta$ -mercaptoethanol, heat denatured at 99°C. 11.4% of supernatant or pellet fraction was loaded and protein was resolved by sodium dodecyl sulfate polyacrylamide gel electrophoresis (SDS-PAGE) and stained with Coomassie Brilliant Blue, and the amount in either fraction (% total) was determined by densitometry in comparison to known quantities of the SUMO-TDP-43-WT. Under these conditions, in the presence of Ulp1 and the absence of PAR, ~50% of the TDP-43 remained in the supernatant fraction at both centrifugal speeds (Figure 3C).

### **Thioflavin T assay**

HIS<sub>6</sub>-SUMO-TDP-43-WT and HIS<sub>6</sub>-SUMO-TDP-43-C25 (10  $\mu$ M) was aggregated *in vitro* as above. At the end of the 200-min reaction, protein was assessed without dilution or with dilution to 1  $\mu$ M using reaction buffer (50mM HEPES-NaOH (pH 7.5), 5% glycerol, 70 mM NaCl, 5 mM DTT, 6 mM TrisHCl (pH 8), 0.6 mM EDTA). Thioflavin-T (ThT) was added into the reaction at 10  $\mu$ M and sample was excited at 440 nm with a 5 nm bandwidth. Fluorescence signal was collected at 482 nm with a 10 nm bandwidth.  $\alpha$ -Synuclein fibrils assembled as described<sup>9</sup> in reaction buffer were used as a positive control.

## Statistics

All statistics were carried out using Graphpad prism 6 software.

## REFERENCES

- [1] Li, X., Romero, P., Rani, M., Dunker, A. K., and Obradovic, Z. (1999) Predicting Protein Disorder for N-, C-, and Internal Regions, *Genome Inform Ser Workshop Genome Inform 10*, 30-40.
- [2] Romero, P., Obradovic, Z., Li, X., Garner, E. C., Brown, C. J., and Dunker, A. K. (2001) Sequence complexity of disordered protein, *Proteins 42*, 38-48.
- [3] Xue, B., Dunbrack, R. L., Williams, R. W., Dunker, A. K., and Uversky, V. N. (2010) PONDR-FIT: a meta-predictor of intrinsically disordered amino acids, *Biochim Biophys Acta 1804*, 996-1010.
- [4] McGurk, L., Gomes, E., Guo, L., Mojsilovic-Petrovic, J., Tran, V., Kalb, R. G., Shorter, J., and Bonini, N. M. (2018) Poly(ADP-Ribose) Prevents Pathological Phase Separation of TDP-43 by Promoting Liquid Demixing and Stress Granule Localization, *Molecular cell 71*, 703-717 e709.
- [5] Schultheisz, H. L., Szymczyna, B. R., and Williamson, J. R. (2009) Enzymatic synthesis and structural characterization of <sup>13</sup>C, <sup>15</sup>N-poly(ADP-ribose), *J Am Chem Soc 131*, 14571-14578.
- [6] Shah, G. M., Poirier, D., Duchaine, C., Brochu, G., Desnoyers, S., Lagueux, J., Verreault, A., Hoflack, J. C., Kirkland, J. B., and Poirier, G. G. (1995) Methods for biochemical study of poly(ADP-ribose) metabolism in vitro and in vivo, *Anal Biochem 227*, 1-13.
- [7] Johnson, B. S., Snead, D., Lee, J. J., McCaffery, J. M., Shorter, J., and Gitler, A. D. (2009) TDP-43 is intrinsically aggregation-prone, and amyotrophic lateral sclerosis-linked mutations accelerate aggregation and increase toxicity, *The Journal of biological chemistry 284*, 20329-20339.
- [8] Rueden, C. T., Schindelin, J., Hiner, M. C., DeZonia, B. E., Walter, A. E., Arena, E. T., and Eliceiri, K. W. (2017) ImageJ2: ImageJ for the next generation of scientific image data, *BMC Bioinformatics 18*, 529.
- [9] Luk, K. C., Covell, D. J., Kehm, V. M., Zhang, B., Song, I. Y., Byrne, M. D., Pitkin, R. M., Decker, S. C., Trojanowski, J. Q., and Lee, V. M. (2016) Molecular and Biological Compatibility with Host Alpha-Synuclein Influences Fibril Pathogenicity, *Cell Rep 16*, 3373-3387.
